# Supplementary material
Source: PubMed Central journal article supplement (PMC4334283)
Supplement: pr500572z_si_002.pdf [file pr500572z_si_002.pdf]

| Sequence                  | -log q-... | -log PEP | Search Engi... | Score | Delta Score | z | Theo...  | Meas...  | Mass... | Fixed... | Varia...  | Project  | Exper... |
|---------------------------|------------|----------|----------------|-------|-------------|---|----------|----------|---------|----------|-----------|----------|----------|
| MS <sup>2</sup> R.MRAVLRS | 2.2393     | 0.1      | Mascot         | 24.63 | 9.46        | 2 | 760.4... | 760.4... | 7.67    |          | Oxidat... | Par1_... | batch_1  |

> Reference spectrum

> Fragments

Select All   Deselect All

a:  1+  2+  3+

b:  1+  2+  3+

c:  1+  2+  3+

x:  1+  2+  3+

y:  1+  2+  3+

z:  1+  2+  3+

yb:

IM:

M[H]:

Neutral loss:

NH3    CH2N2    C3H6

Max neutral loss count: 3

Mass tolerance: 0.4 Da

Expert Mode:  on    off

> Configuration

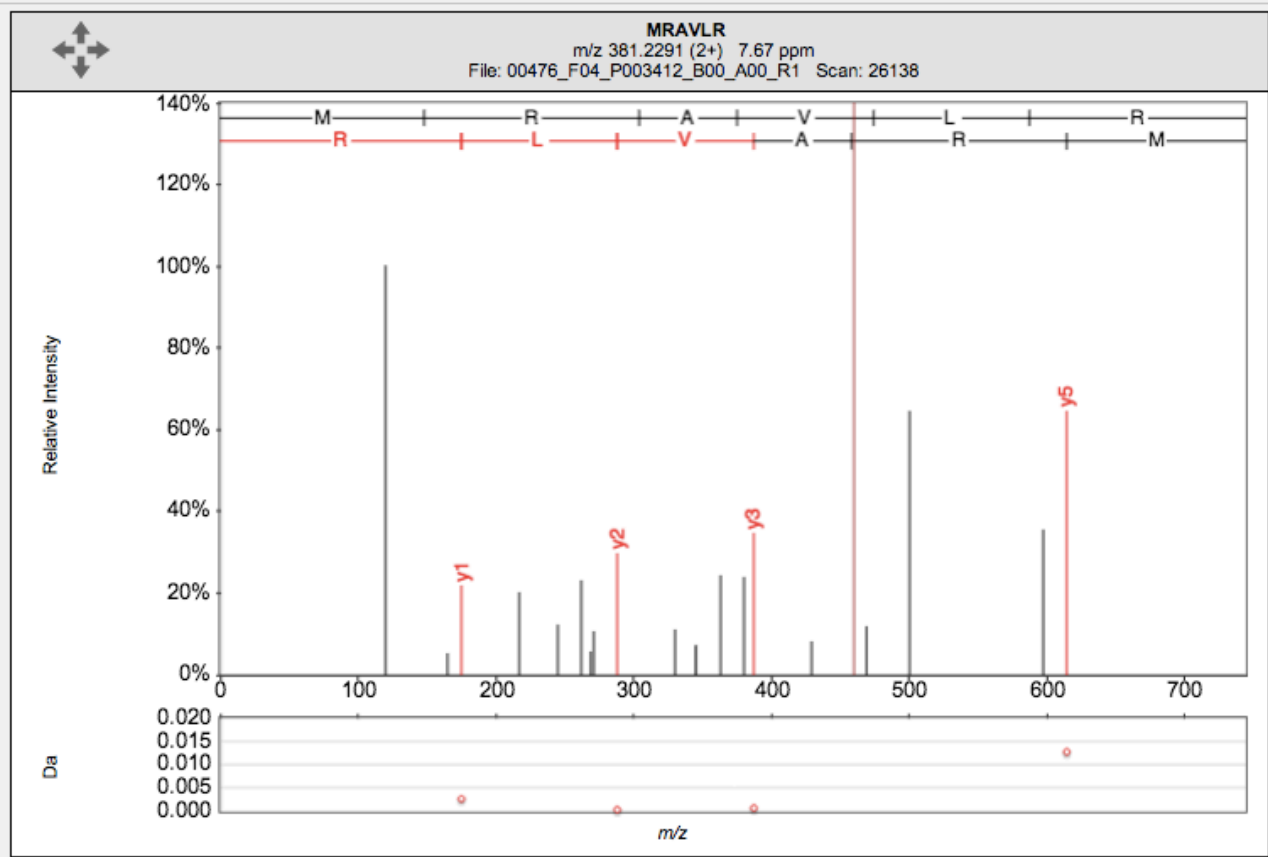

| # | Seq # | y1+      |
|---|-------|----------|
| 1 | M 6   |          |
| 2 | R 5   | 614.4097 |
| 3 | A 4   | 458.3085 |
| 4 | V 3   | 387.2714 |
| 5 | L 2   | 288.203  |
| 6 | R 1   | 175.119  |

| Sequence                     | -log q-... | -log PEP | Search Engi... | Score | Delta Score | z | Theo...  | Meas...  | Mass... | Fixed... | Varia...  | Project   | Exper... |
|------------------------------|------------|----------|----------------|-------|-------------|---|----------|----------|---------|----------|-----------|-----------|----------|
| MS <sup>2</sup> R.MRAVLRSR.L | 2.2997     | 0.21     | Andromeda      | 90.66 | 34.65       | 2 | 1003.... | 1003.... | 0.01    |          | Oxidat... | Cutler... | Roche... |

> Reference spectrum

> Fragments

Select All    Deselect All

a:  1+  2+  3+

b:  1+  2+  3+

c:  1+  2+  3+

x:  1+  2+  3+

y:  1+  2+  3+

z:  1+  2+  3+

yb:

IM:

M[H]:

Neutral loss:

C3H9N3    H2O    NH3

CO    CH4O    CH2N2

C4H6N2

Max neutral loss count: 3

Mass tolerance: 0.4 Da

Expert Mode:  on    off

> Configuration

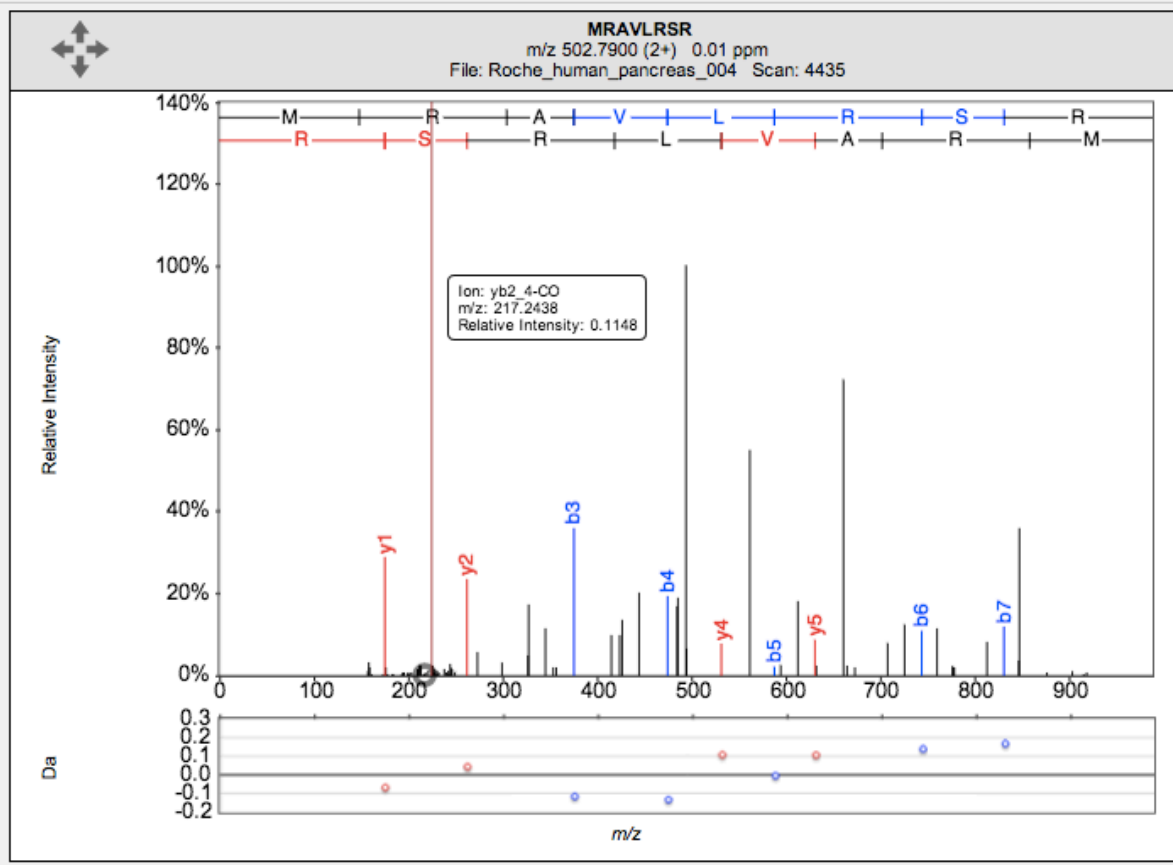

| b1+      | # | Seq | # | y1+      |
|----------|---|-----|---|----------|
| 148.0427 | 1 | M   | 8 |          |
| 304.1438 | 2 | R   | 7 | 857.5428 |
| 375.1809 | 3 | A   | 6 | 701.4417 |
| 474.2493 | 4 | V   | 5 | 630.4046 |
| 587.3334 | 5 | L   | 4 | 531.3362 |
| 743.4345 | 6 | R   | 3 | 418.2521 |
| 830.4665 | 7 | S   | 2 | 262.151  |
|          | 8 | R   | 1 | 175.119  |

| Sequence                          | -log q-... | -log PEP | Search Engl... | Score  | Delta Score | z | Theo...  | Meas...  | Mass... | Fixed... | Varia... | Project  | Exper... |
|-----------------------------------|------------|----------|----------------|--------|-------------|---|----------|----------|---------|----------|----------|----------|----------|
| <b>MS<sup>2</sup></b> K.EYLEINK.I | 2.9425     | 1.49     | Andromeda      | 114.19 | 28.92       | 2 | 907.4... | 907.4... | 0.01    |          |          | Geige... | MFM      |
| <b>MS<sup>2</sup></b> K.EYLEINK.I | 2.9425     | 1.49     | Andromeda      | 114.19 | 28.92       | 2 | 907.4... | 907.4... | 0.01    |          |          | Geige... | MFM      |
| <b>MS<sup>2</sup></b> K.EYLEINK.I | 2.3255     | 0.93     | Andromeda      | 81.3   | 12.88       | 2 | 907.4... | 907.4... | 0.01    |          |          | Geige... | HCC1...  |
| <b>MS<sup>2</sup></b> K.EYLEINK.I | 2.3255     | 0.93     | Andromeda      | 81.3   | 12.88       | 2 | 907.4... | 907.4... | 0.01    |          |          | Geige... | HCC1...  |
| <b>MS<sup>2</sup></b> K.EYLEINK.I | 2.2642     | 0.82     | Andromeda      | 47.92  | 15.96       | 2 | 907.4... | 907.4... | 0.01    |          |          | Nagar... | Deep ... |

< 1 2 >

> Reference spectrum

> Fragments

Select All   Deselect All

a:  1+  2+  3+

b:  1+  2+  3+

c:  1+  2+  3+

x:  1+  2+  3+

y:  1+  2+  3+

z:  1+  2+  3+

yb:

IM:

M[H]:

Neutral loss:

NH3    H2O    C4H11N

CH3NO    C2H4    C4H8

C2H4O2

Max neutral loss count: 3

Mass tolerance: 0.4 Da

Expert Mode:  on  off

> Configuration

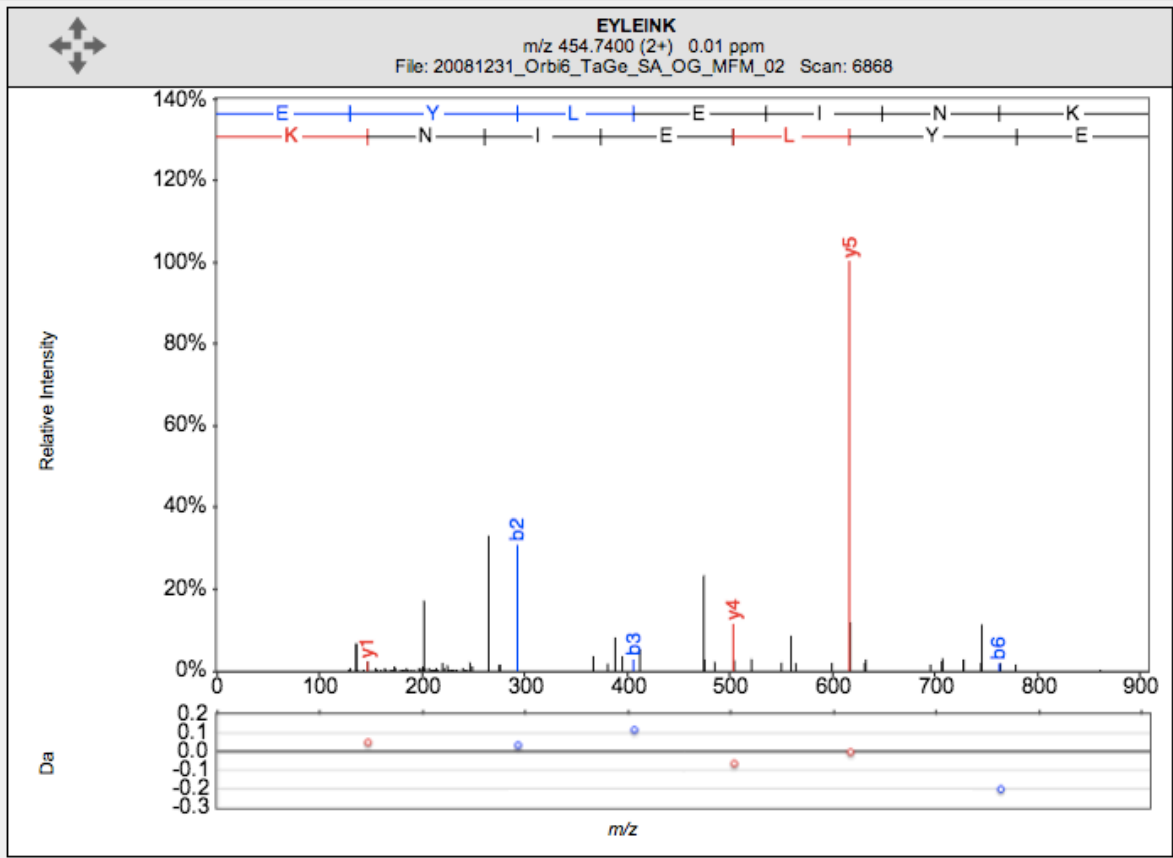

| b1+      | # | Seq | # | y1+      |
|----------|---|-----|---|----------|
| 130.0499 | 1 | E   | 7 |          |
| 293.1132 | 2 | Y   | 6 | 779.4298 |
| 406.1973 | 3 | L   | 5 | 616.3665 |
| 535.2399 | 4 | E   | 4 | 503.2824 |
| 648.3239 | 5 | I   | 3 | 374.2398 |
| 762.3668 | 6 | N   | 2 | 261.1557 |
|          | 7 | K   | 1 | 147.1128 |

| Sequence                           | -log q... | -log PEP | Search Engl... | Score | Delta Score | z | Theo... | Meas... | Mass... | Fixed... | Varia... | Project   | Exper...   |
|------------------------------------|-----------|----------|----------------|-------|-------------|---|---------|---------|---------|----------|----------|-----------|------------|
| <b>MS<sup>2</sup></b> R.YATICPLR.Y | 2.2871    | 1.69     | Andromeda      | 48.28 | 12.77       | 2 | 1152... | 1152... | 0       | Carba... |          | Pirmor... | Full pr... |
| <b>MS<sup>2</sup></b> R.YATICPLR.Y | 2.0744    | 0.91     | Andromeda      | 43.08 | 11.59       | 2 | 1152... | 1152... | 0       | Carba... |          | Pirmor... | Full pr... |

> Reference spectrum

> Fragments

Select All   Deselect All

a:  1+  2+  3+

b:  1+  2+  3+

c:  1+  2+  3+

x:  1+  2+  3+

y:  1+  2+  3+

z:  1+  2+  3+

yb:

IM:

M[H]:

Neutral loss:

H<sub>2</sub>O    NH<sub>3</sub>    C<sub>4</sub>H<sub>6</sub>N<sub>2</sub>

C<sub>3</sub>H<sub>9</sub>N<sub>3</sub>    C<sub>4</sub>H<sub>8</sub>    CH<sub>2</sub>N<sub>2</sub>

C<sub>3</sub>H<sub>6</sub>    CO    C<sub>2</sub>H<sub>4</sub>O

Max neutral loss count: 3

Mass tolerance: 0.4 Da

Expert Mode:  on    off

> Configuration

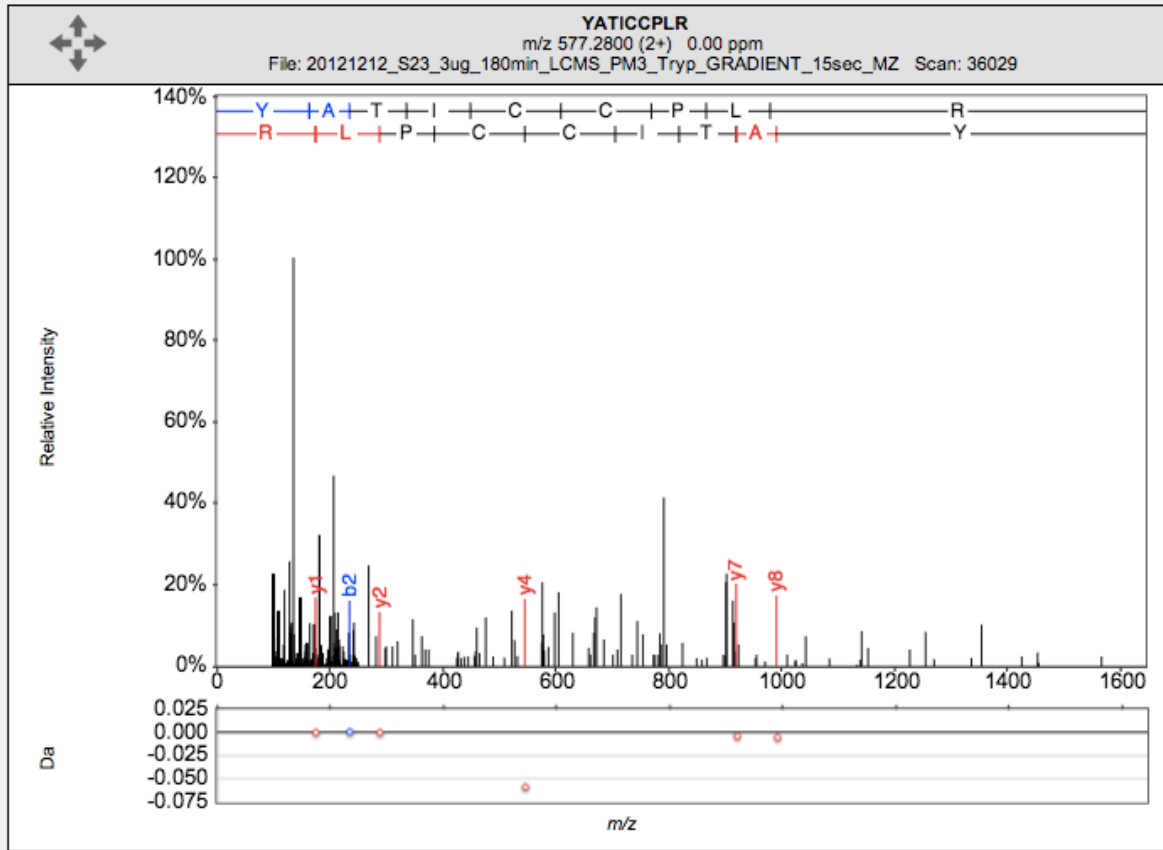

| b1+      | # | Seq | # | y1+      |
|----------|---|-----|---|----------|
| 164.0706 | 1 | Y   | 9 |          |
| 235.1077 | 2 | A   | 8 | 990.4859 |
| 336.1554 | 3 | T   | 7 | 919.4488 |
| 449.2395 | 4 | I   | 6 | 818.4011 |
| 609.2701 | 5 | C   | 5 | 705.3171 |
| 769.3008 | 6 | C   | 4 | 545.2864 |
| 866.3535 | 7 | P   | 3 | 385.2558 |
| 979.4376 | 8 | L   | 2 | 288.203  |
|          | 9 | R   | 1 | 175.119  |

| Sequence                           | -log q-... | -log PEP | Search Engl... | Score | Delta Score | z | Theo...  | Meas...  | Mass... | Fixed... | Varia... | Project  | Exper... |
|------------------------------------|------------|----------|----------------|-------|-------------|---|----------|----------|---------|----------|----------|----------|----------|
| <b>MS<sup>2</sup></b> K.VLANLGSR.D | 2.2639     | 0.04     | Mascot         | 8.17  | 1.76        | 2 | 828.4... | 828.4... | 1.52    |          |          | Geige... | Prote... |

> Reference spectrum

> Fragments

Select All   Deselect All

a:  1+  2+  3+

b:  1+  2+  3+

c:  1+  2+  3+

x:  1+  2+  3+

y:  1+  2+  3+

z:  1+  2+  3+

yb:

IM:

M[H]:

Neutral loss:

Max neutral loss count: 3

Mass tolerance: 0.4 Da

Expert Mode:  on  off

> Configuration

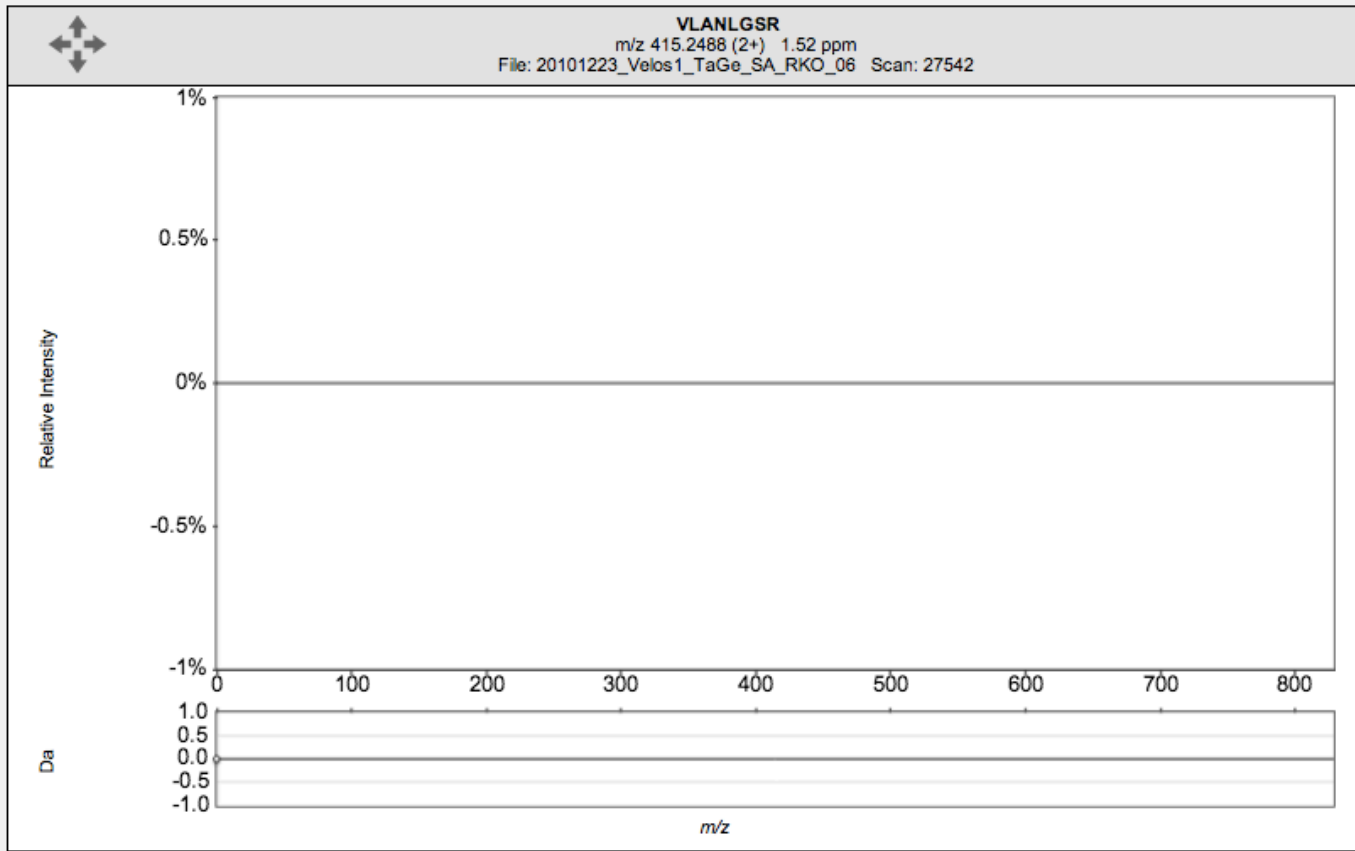

| # | Seq | # |
|---|-----|---|
| 1 | V   | 8 |
| 2 | L   | 7 |
| 3 | A   | 6 |
| 4 | N   | 5 |
| 5 | L   | 4 |
| 6 | G   | 3 |
| 7 | S   | 2 |
| 8 | R   | 1 |

| Sequence                          | -log q-... | -log PEP | Search Engi... | Score | Delta Score | z | Theo...  | Meas...  | Mass... | Fixed... | Varia... | Project  | Exper...  |
|-----------------------------------|------------|----------|----------------|-------|-------------|---|----------|----------|---------|----------|----------|----------|-----------|
| <b>MS<sup>2</sup></b> K.RMRAVLR.S | 2.4405     | 1.03     | Mascot         | 22.78 | 1.77        | 2 | 900.5... | 900.5... | 6.99    |          |          | Geige... | MCF10a    |
| <b>MS<sup>2</sup></b> K.RMRAVLR.S | 2.4405     | 1.03     | Mascot         | 22.78 | 1.77        | 2 | 900.5... | 900.5... | 6.99    |          |          | Geige... | MCF10a    |
| <b>MS<sup>2</sup></b> K.RMRAVLR.S | 2.0027     | 0.02     | Mascot         | 23.97 | n/a         | 2 | 900.5... | 900.5... | 4.92    |          |          | CPTA...  | Clinic... |

> Reference spectrum

> Fragments

Select All   Deselect All

a:  1+  2+  3+

b:  1+  2+  3+

c:  1+  2+  3+

x:  1+  2+  3+

y:  1+  2+  3+

z:  1+  2+  3+

yb:

IM:

M[H]:

Neutral loss:

C4H6N2  C3H6S  C3H9N3

H2O  C3H6  CH2N2

C4H8  NH3  C2H4S

Max neutral loss count:

Mass tolerance:  Da

Expert Mode:  on  off

> Configuration

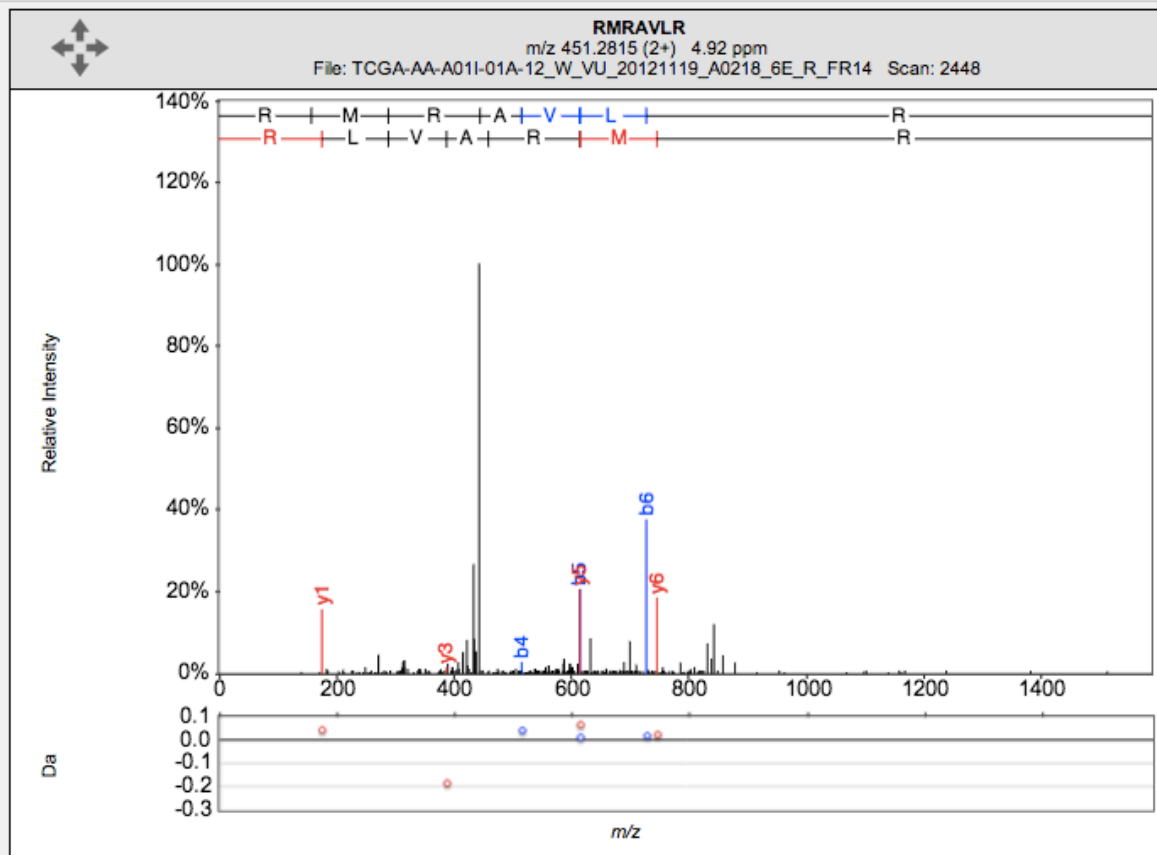

| b1+      | # | Seq | # | y1+      |
|----------|---|-----|---|----------|
| 157.1084 | 1 | R   | 7 |          |
| 288.1489 | 2 | M   | 6 | 745.4501 |
| 444.25   | 3 | R   | 5 | 614.4097 |
| 515.2871 | 4 | A   | 4 | 458.3085 |
| 614.3555 | 5 | V   | 3 | 387.2714 |
| 727.4396 | 6 | L   | 2 | 288.203  |
|          | 7 | R   | 1 | 175.119  |

| Sequence                          | -log q... | -log PEP | Search Engl... | Score  | Delta Score | z | Theo...  | Meas...  | Mass... | Fixed... | Varia... | Project  | Exper... |
|-----------------------------------|-----------|----------|----------------|--------|-------------|---|----------|----------|---------|----------|----------|----------|----------|
| <b>MS<sup>2</sup></b> K.EYLEINK.I | 2.9425    | 1.49     | Andromeda      | 114.19 | 28.92       | 2 | 907.4... | 907.4... | 0.01    |          |          | Geige... | MFM      |
| <b>MS<sup>2</sup></b> K.EYLEINK.I | 2.9425    | 1.49     | Andromeda      | 114.19 | 28.92       | 2 | 907.4... | 907.4... | 0.01    |          |          | Geige... | MFM      |
| <b>MS<sup>2</sup></b> K.EYLEINK.I | 2.3255    | 0.93     | Andromeda      | 81.3   | 12.88       | 2 | 907.4... | 907.4... | 0.01    |          |          | Geige... | HCC1...  |
| <b>MS<sup>2</sup></b> K.EYLEINK.I | 2.3255    | 0.93     | Andromeda      | 81.3   | 12.88       | 2 | 907.4... | 907.4... | 0.01    |          |          | Geige... | HCC1...  |
| <b>MS<sup>2</sup></b> K.EYLEINK.I | 2.2642    | 0.82     | Andromeda      | 47.92  | 15.96       | 2 | 907.4... | 907.4... | 0.01    |          |          | Nagar... | Deep ... |

< 1 2 >

> Reference spectrum

> Fragments

Select All Deselect All

a:  1+  2+  3+

b:  1+  2+  3+

c:  1+  2+  3+

x:  1+  2+  3+

y:  1+  2+  3+

z:  1+  2+  3+

yb:

IM:

M[H]:

Neutral loss:

NH3  H2O  C4H11N

CH3NO  C2H4  C4H8

C2H4O2

Max neutral loss count: 3

Mass tolerance: 0.4 Da

Expert Mode:  on  off

> Configuration

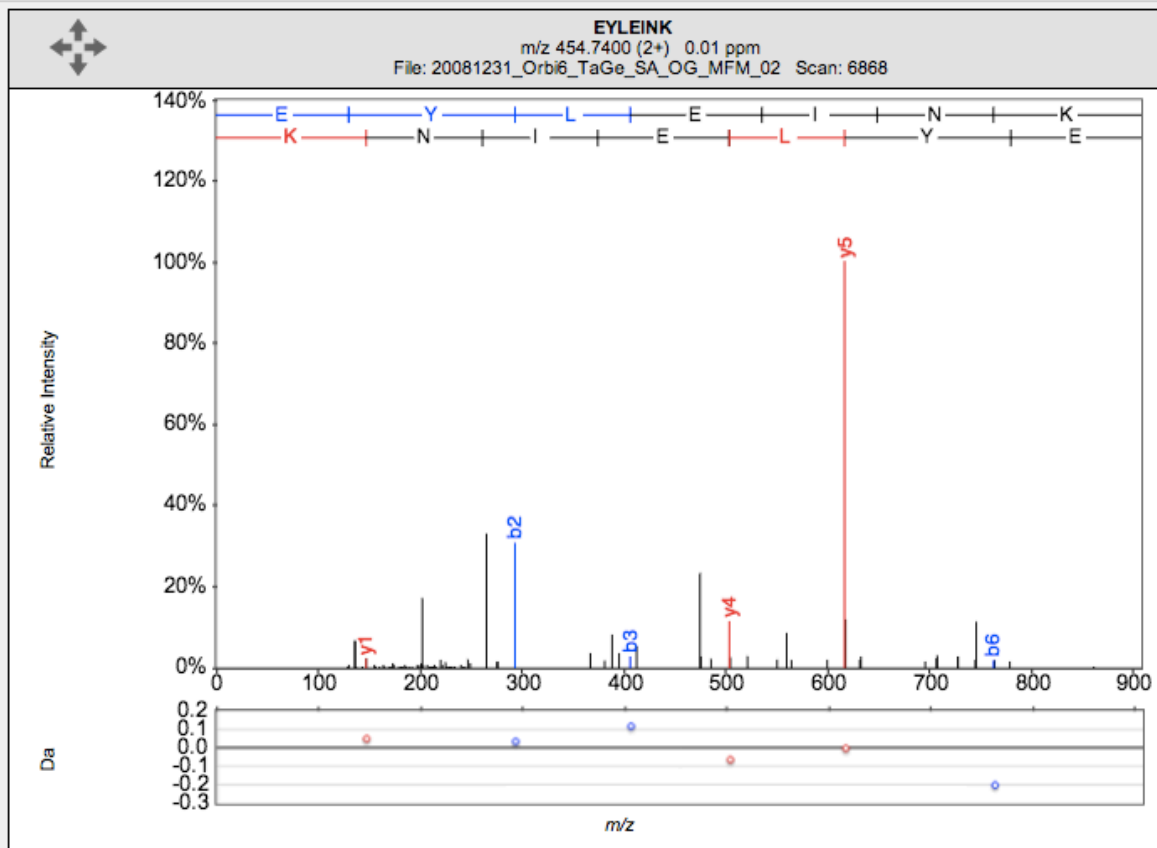

| b1+      | # | Seq | # | y1+      |
|----------|---|-----|---|----------|
| 130.0499 | 1 | E   | 7 |          |
| 293.1132 | 2 | Y   | 6 | 779.4298 |
| 406.1973 | 3 | L   | 5 | 616.3665 |
| 535.2399 | 4 | E   | 4 | 503.2824 |
| 648.3239 | 5 | I   | 3 | 374.2398 |
| 762.3668 | 6 | N   | 2 | 261.1557 |
|          | 7 | K   | 1 | 147.1128 |

| Sequence                                  | $-\log q\text{-}...$ | $-\log \text{PEP}$ | Search Engl... | Score | Delta Score | z | Theo...  | Meas...  | Mass... | Fixed... | Varia... | Project | Exper...  |
|-------------------------------------------|----------------------|--------------------|----------------|-------|-------------|---|----------|----------|---------|----------|----------|---------|-----------|
| <b>MS<sup>2</sup></b> R.NDTVQGVL RDVWVR.V | 2.3816               | 2.45               | Andromeda      | 98.9  | 38.35       | 2 | 1655.... | 1655.... | 0       |          |          | CPTA... | Clinic... |

> Reference spectrum

> Fragments

Select All Deselect All

a:  1+  2+  3+

b:  1+  2+  3+

c:  1+  2+  3+

x:  1+  2+  3+

y:  1+  2+  3+

z:  1+  2+  3+

yb:

IM:

M[H]:

Neutral loss:

C2H5NO  CO2  C2H4O

C4H8  C2O  C2H4O2

C4H6N2  NH3  C3H5NO

H2O

Max neutral loss count: 3

Mass tolerance: 0.4 Da

Expert Mode:  on  off

> Configuration

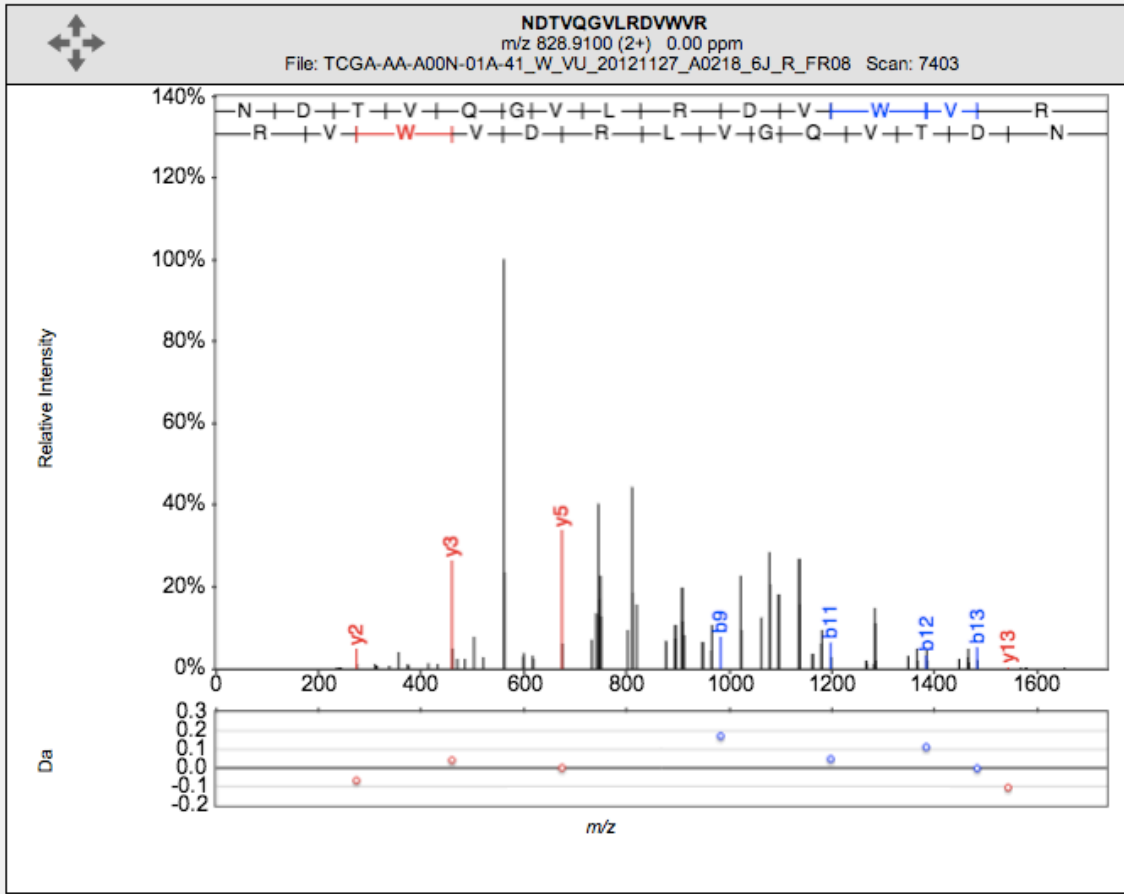

| b1+       | #  | Seq | #  | y1+       |
|-----------|----|-----|----|-----------|
| 115.0502  | 1  | N   | 14 |           |
| 230.0771  | 2  | D   | 13 | 1542.8387 |
| 331.1248  | 3  | T   | 12 | 1427.8118 |
| 430.1932  | 4  | V   | 11 | 1326.7641 |
| 558.2518  | 5  | Q   | 10 | 1227.6957 |
| 615.2733  | 6  | G   | 9  | 1099.6371 |
| 714.3417  | 7  | V   | 8  | 1042.6156 |
| 827.4258  | 8  | L   | 7  | 943.5472  |
| 983.5269  | 9  | R   | 6  | 830.4631  |
| 1098.5538 | 10 | D   | 5  | 674.362   |
| 1197.6222 | 11 | V   | 4  | 559.3351  |
| 1383.7015 | 12 | W   | 3  | 460.2667  |
| 1482.77   | 13 | V   | 2  | 274.1874  |
|           | 14 | R   | 1  | 175.119   |
