# Supplementary material
Source: PubMed Central journal article supplement (PMC4334283)
Supplement: pr500572z_si_003.pdf [file pr500572z_si_003.pdf]

| Sequence                          | -log q-... | -log PEP | Search Engr... | Score | Delta Score | z | Theoretic... | Measured... | Mass Err... | Fixed Mo...   | Variable ... | Project    | Experiment   |
|-----------------------------------|------------|----------|----------------|-------|-------------|---|--------------|-------------|-------------|---------------|--------------|------------|--------------|
| <b>MS<sup>2</sup></b> K.SSAAMAK.A | 2.0898     | -99      | Mascot         | 26.98 | 4.39        | 2 | 736.4728     | 736.4657    | -9.62       | Dimethyl:2... |              | Munoz_M... | IPS_Singa... |
| <b>MS<sup>2</sup></b> K.SSAAMAK.A | 2.0898     | -99      | Mascot         | 26.98 | 4.39        | 2 | 736.4728     | 736.4657    | -9.62       | Dimethyl:2... |              | Munoz_M... | IPS_Singa... |
| <b>MS<sup>2</sup></b> K.SSAAMAK.A | 2.0898     | -99      | Mascot         | 26.98 | 4.39        | 2 | 736.4728     | 736.4657    | -9.62       | Dimethyl:2... |              | Munoz_M... | IPS_Singa... |

> Reference spectrum

> Fragments

Select All Deselect All

a:  1+  2+  3+

b:  1+  2+  3+

c:  1+  2+  3+

x:  1+  2+  3+

y:  1+  2+  3+

z:  1+  2+  3+

yb:

IM:

M[H]:

Neutral loss:

CH4O  NH3  C3H6S

C2H4S  H2O  CO

Max neutral loss count: 3

Mass tolerance: 0.4 Da

Expert Mode:  on  off

> Configuration

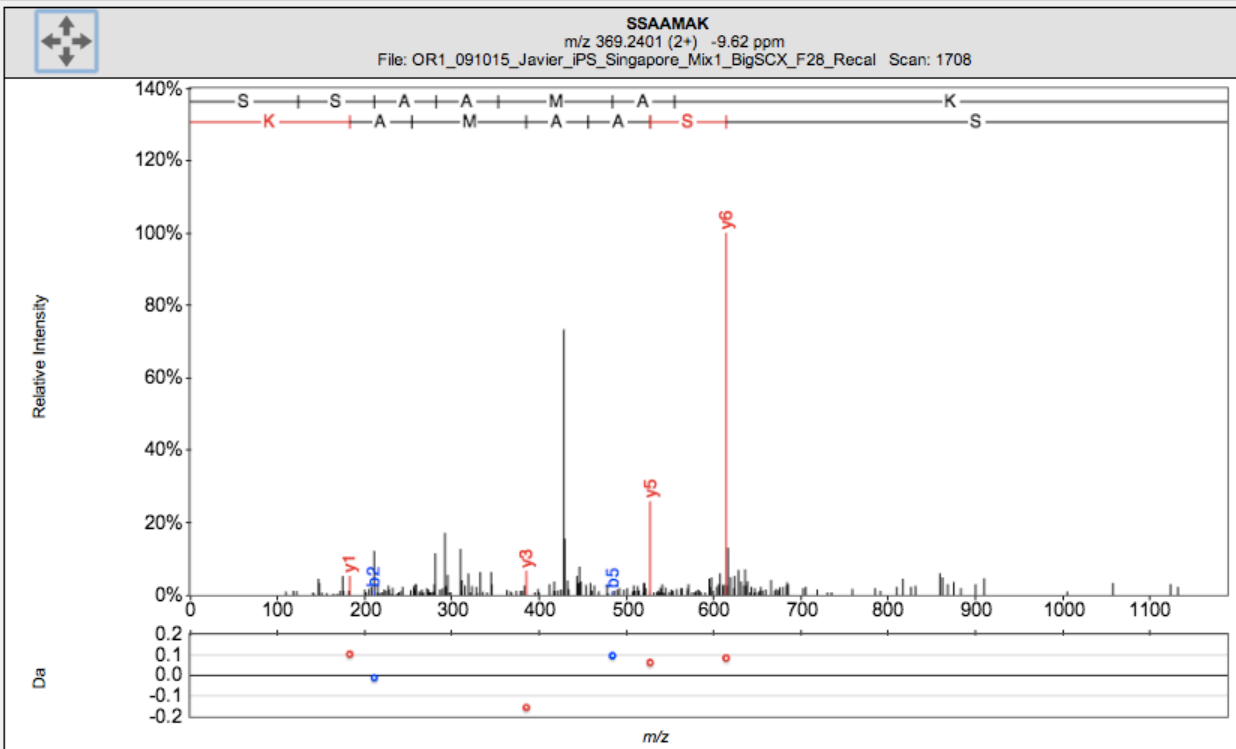

| b1+             | # | Seq # | y1+             |
|-----------------|---|-------|-----------------|
| 124.115         | 1 | S     | 7               |
| <b>211.147</b>  | 2 | S     | <b>614.3723</b> |
| 282.1841        | 3 | A     | <b>527.3403</b> |
| 353.2212        | 4 | A     | 456.3032        |
| <b>484.2617</b> | 5 | M     | <b>385.2661</b> |
| 555.2988        | 6 | A     | 254.2256        |
|                 | 7 | K     | <b>183.1885</b> |

| Sequence                                                         | -log q... | -log PEP | Search Engl... | Score | Delta Score | z | Theoretic... | Measured... | Mass Err... | Fixed Mo...  | Variable ... | Project     | Experiment     |
|------------------------------------------------------------------|-----------|----------|----------------|-------|-------------|---|--------------|-------------|-------------|--------------|--------------|-------------|----------------|
| <input type="checkbox"/> MS <sup>2</sup> R.AVFDLSSK.T            | 2.3667    | 1.56     | Andromeda      | 63.49 | 11.49       | 2 | 873.4687     | 865.4545    | -9175.15    | Label:13C... |              | Geiger_C... | HMELonza       |
| <input type="checkbox"/> MS <sup>2</sup> R.AVFDLSSK.T            | 2.3667    | 1.56     | Andromeda      | 63.49 | 11.49       | 2 | 873.4687     | 865.4545    | -9175.15    | Label:13C... |              | Geiger_C... | HMELonza       |
| <input checked="" type="checkbox"/> MS <sup>2</sup> R.AVFDLSSK.T | 2.0768    | 1.43     | Andromeda      | 98.52 | 29.33       | 2 | 865.4545     | 865.4545    | -0.01       |              |              | Joshi_MS... | Label-free ... |
| <input type="checkbox"/> MS <sup>2</sup> R.AVFDLSSK.T            | 2.0755    | 1.43     | Andromeda      | 82.45 | 6.42        | 2 | 865.4545     | 865.4545    | -0.01       |              |              | CPTAC_C...  | Clinical_pr... |
| <input type="checkbox"/> MS <sup>2</sup> R.AVFDLSSK.T            | 2.4811    | 1.41     | Andromeda      | 60.59 | 18.48       | 2 | 873.4687     | 865.4545    | -9175.15    | Label:13C... |              | Geiger_C... | HCC1937        |

< 1 2 >

> Reference spectrum

> Fragments

Select All Deselect All

a:  1+  2+  3+

b:  1+  2+  3+

c:  1+  2+  3+

x:  1+  2+  3+

y:  1+  2+  3+

z:  1+  2+  3+

yb:

IM:

M[H]:

Neutral loss:

H2O  NH3  C2O

C4H9N  CH4O  C3H9N

CO  C4H8  C2H5N

C5H11N  C4H11N  C3H6

C2H4O2

Max neutral loss count: 3

Mass tolerance: 0.4 Da

Expert Mode:  on  off

> Configuration

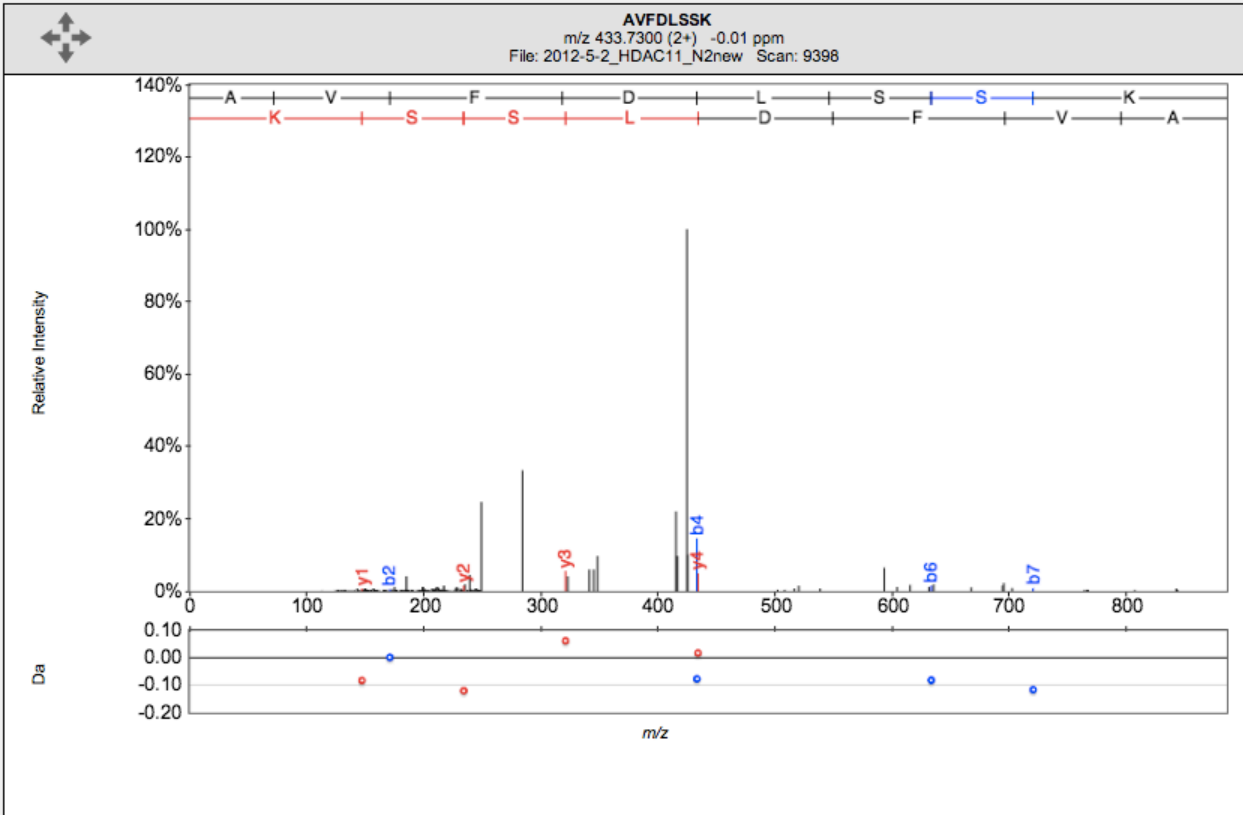

| b1+      | # | Seq | # | y1+      |
|----------|---|-----|---|----------|
| 72.0444  | 1 | A   | 8 |          |
| 171.1128 | 2 | V   | 7 | 795.4247 |
| 318.1812 | 3 | F   | 6 | 696.3563 |
| 433.2082 | 4 | D   | 5 | 549.2879 |
| 546.2922 | 5 | L   | 4 | 434.2609 |
| 633.3243 | 6 | S   | 3 | 321.1769 |
| 720.3563 | 7 | S   | 2 | 234.1448 |
|          | 8 | K   | 1 | 147.1128 |

| Sequence                              | -log q-... | -log PEP | Search Engr... | Score | Delta Score | z | Theoretic... | Measured... | Mass Err... | Fixed Mo... | Variable ... | Project    | Experiment   |
|---------------------------------------|------------|----------|----------------|-------|-------------|---|--------------|-------------|-------------|-------------|--------------|------------|--------------|
| <b>MS<sup>2</sup></b> R.VFQSGQGGMGIKA | 2.07       | 0.21     | Mascot         | 29.98 | 10.36       | 3 | 1222.6380    | 1222.6315   | -5.34       | Dimethyl... | Oxidation... | Munoz_E... | Comparis...  |
| <b>MS<sup>2</sup></b> R.VFQSGQGGMGIKA | 2.07       | 0.21     | Mascot         | 29.98 | 10.36       | 3 | 1222.6380    | 1222.6315   | -5.34       | Dimethyl... | Oxidation... | Munoz_E... | Compariso... |

> Reference spectrum

> Fragments

Select All   Deselect All

a:  1+  2+  3+

b:  1+  2+  3+

c:  1+  2+  3+

x:  1+  2+  3+

y:  1+  2+  3+

z:  1+  2+  3+

yb:

IM:

M[H]:

Neutral loss:

Max neutral loss count: 3

Mass tolerance: 0.4 Da

Expert Mode:  on  off

> Configuration

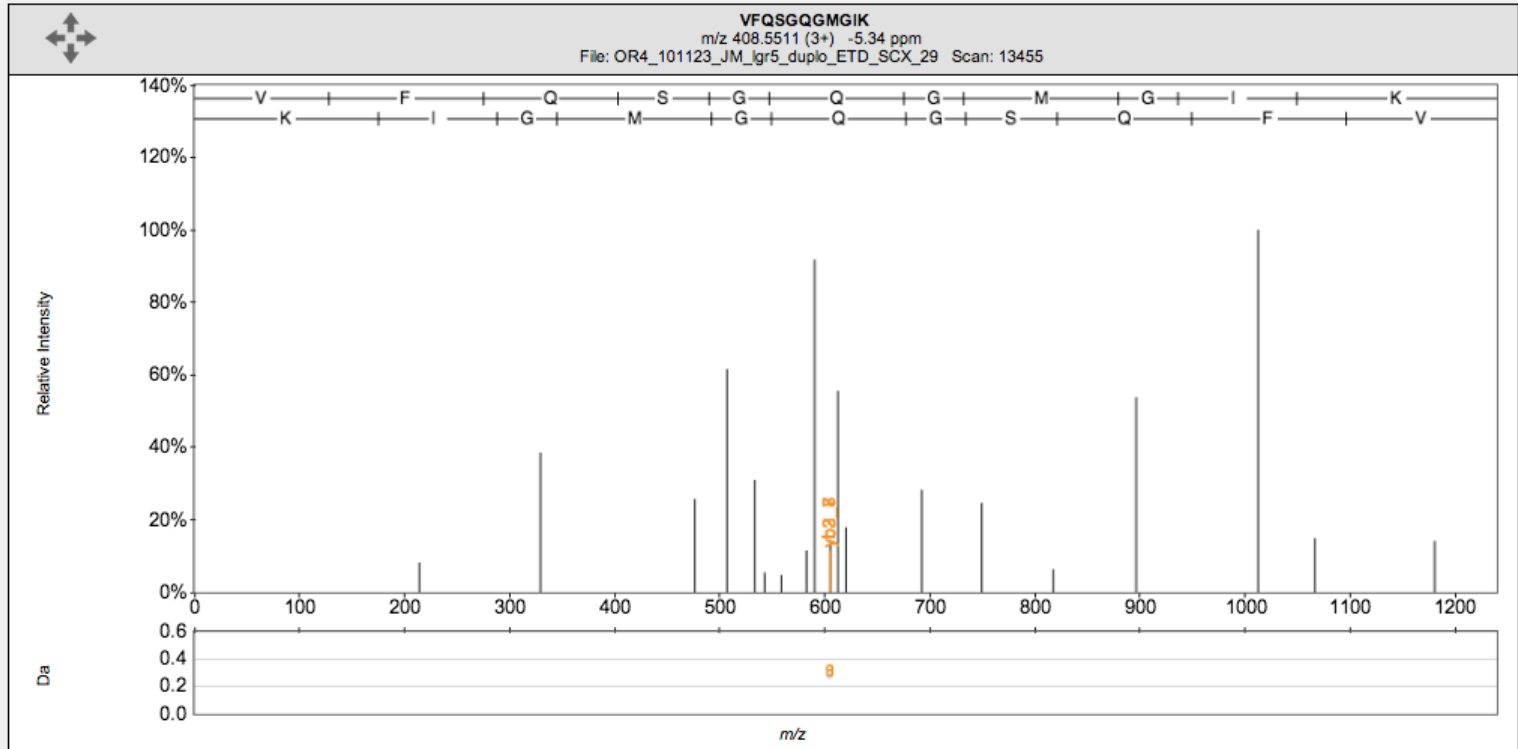

Fragment Ion Table

| Sequence                           | -log q... | -log PEP | Search Engl... | Score | Delta Score | z | Theoretic... | Measured... | Mass Err... | Fixed Mo... | Variable ... | Project     | Experiment    |
|------------------------------------|-----------|----------|----------------|-------|-------------|---|--------------|-------------|-------------|-------------|--------------|-------------|---------------|
| <b>MS<sup>2</sup></b> K.QIQEGVIK.F | 2.346     | 1.88     | Andromeda      | 93.43 | 2.36        | 2 | 913.5233     | 913.5233    | 0.01        |             |              | Maier_MC... | tissue_pro... |
| <b>MS<sup>2</sup></b> K.QIQEGVIK.F | 5         | 1        | Mascot         | 38.48 | 1.72        | 2 | 913.5233     | 914.5187    | 1089.7      |             |              | Nagaraj_... | Deep prot...  |
| <b>MS<sup>2</sup></b> K.QIQEGVIK.F | 3.0218    | 0.39     | Mascot         | 49.95 | 2.07        | 2 | 913.5233     | 914.5184    | 1089.31     |             |              | Human_b...  | Proteome ...  |
| <b>MS<sup>2</sup></b> K.QIQEGVIK.F | 3.0687    | 0.31     | Mascot         | 51.09 | 2.27        | 2 | 913.5233     | 914.5179    | 1088.74     |             |              | Human_b...  | Proteome ...  |
| <b>MS<sup>2</sup></b> K.QIQEGVIK.F | 2.0583    | 0.15     | Mascot         | 24.22 | 7.65        | 2 | 913.5233     | 913.5237    | 0.51        |             |              | Human_b...  | Proteome ...  |

> Reference spectrum

> Fragments

Select All Deselect All

a:  1+  2+  3+

b:  1+  2+  3+

c:  1+  2+  3+

x:  1+  2+  3+

y:  1+  2+  3+

z:  1+  2+  3+

yb:

IM:

M[H]:

Neutral loss:

H2O  C3H6  NH3

C2H5NO  C2H5N  C5H11N

C3H9N  C3H5NO  CH3NO

C2H4  C4H9N  C4H11N

CO

Max neutral loss count: 3

Mass tolerance: 0.4 Da

Expert Mode:  on  off

> Configuration

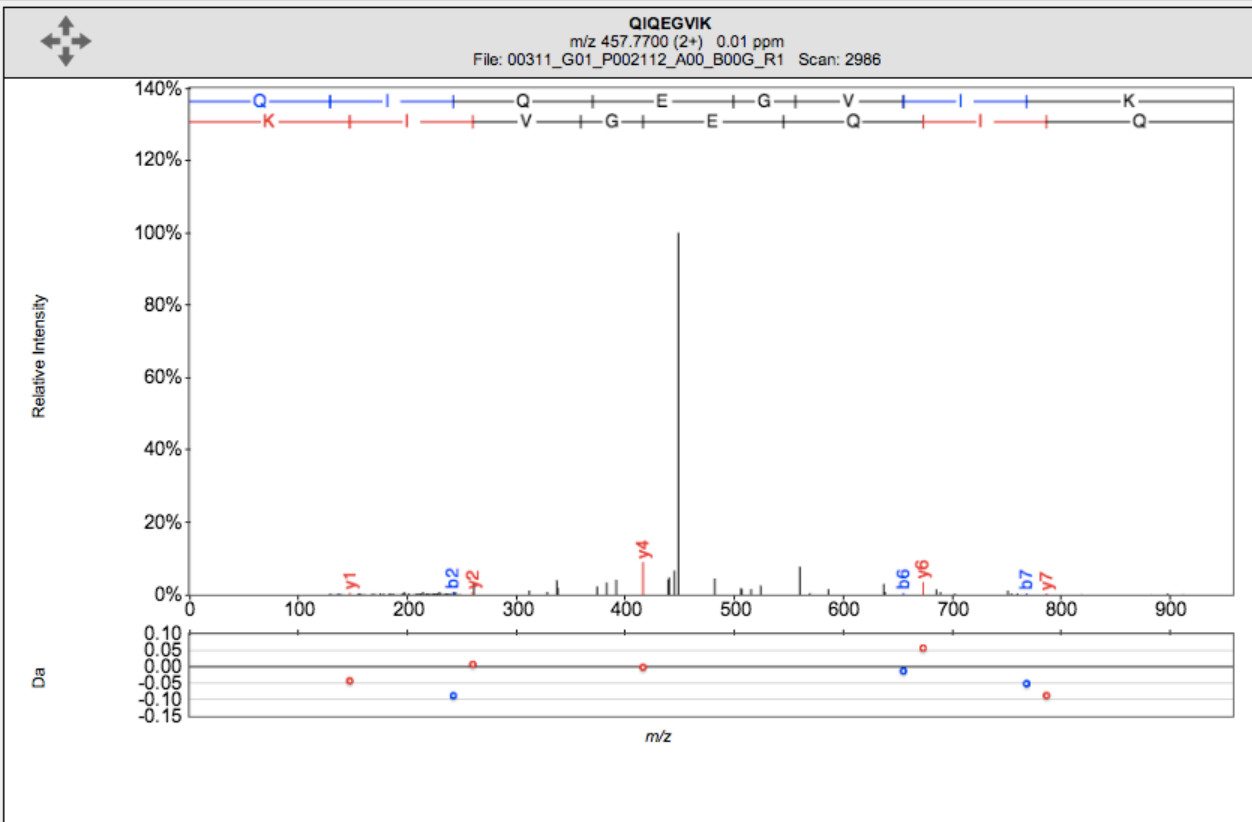

| b1+      | # | Seq # | y1+               |
|----------|---|-------|-------------------|
| 129.0659 | 1 | Q     | 8                 |
| 242.1499 | 2 | I     | 7 <b>786.472</b>  |
| 370.2085 | 3 | Q     | 6 <b>673.3879</b> |
| 499.2511 | 4 | E     | 5 545.3293        |
| 556.2726 | 5 | G     | 4 <b>416.2867</b> |
| 655.341  | 6 | V     | 3 359.2653        |
| 768.425  | 7 | I     | 2 <b>260.1969</b> |
|          | 8 | K     | 1 <b>147.1128</b> |

| Sequence                          | -log q-... | -log PEP | Search Engi... | Score | Delta Score | z | Theoretic... | Measured... | Mass Err... | Fixed Mo... | Variable ... | Project      | Experiment     |
|-----------------------------------|------------|----------|----------------|-------|-------------|---|--------------|-------------|-------------|-------------|--------------|--------------|----------------|
| <b>MS<sup>2</sup></b> K.EFKNALK.K | 2.6669     | 1.16     | Andromeda      | 97.07 | 10.2        | 2 | 848.4756     | 848.4756    | 0           |             |              | Cutler_Pe... | Roche_hu...    |
| <b>MS<sup>2</sup></b> K.EFKNALK.K | 2.6711     | 0.93     | Andromeda      | 94.26 | 24.26       | 2 | 848.4756     | 848.4756    | 0           |             |              | Cutler_Pe... | Roche_hu...    |
| <b>MS<sup>2</sup></b> K.EFKNALK.K | 2.2728     | 0.6      | Andromeda      | 76.85 | 6.85        | 2 | 848.4756     | 848.4756    | 0           |             |              | IEC_prote... | colon          |
| <b>MS<sup>2</sup></b> K.EFKNALK.K | 2.0411     | 0.66     | Andromeda      | 76.85 | 5.5         | 2 | 848.4756     | 848.4756    | 0           |             |              | Moghadda...  | full proteo... |
| <b>MS<sup>2</sup></b> K.EFKNALK.K | 2.3445     | 0.58     | Andromeda      | 76.04 | 6.65        | 2 | 848.4756     | 848.4756    | 0           |             |              | Cutler_Pe... | Roche_hu...    |

< 1 2 3 >

> Reference spectrum

> Fragments

Select All Deselect All

a:  1+  2+  3+

b:  1+  2+  3+

c:  1+  2+  3+

x:  1+  2+  3+

y:  1+  2+  3+

z:  1+  2+  3+

yb:

IM:

M[H]:

Neutral loss:

C5H11N  NH3  C4H8

H2O  C2H5N  C4H9N

C3H6  C4H11N  C3H9N

C2H4O2

Max neutral loss count: 3

Mass tolerance: 0.4 Da

Expert Mode:  on  off

> Configuration

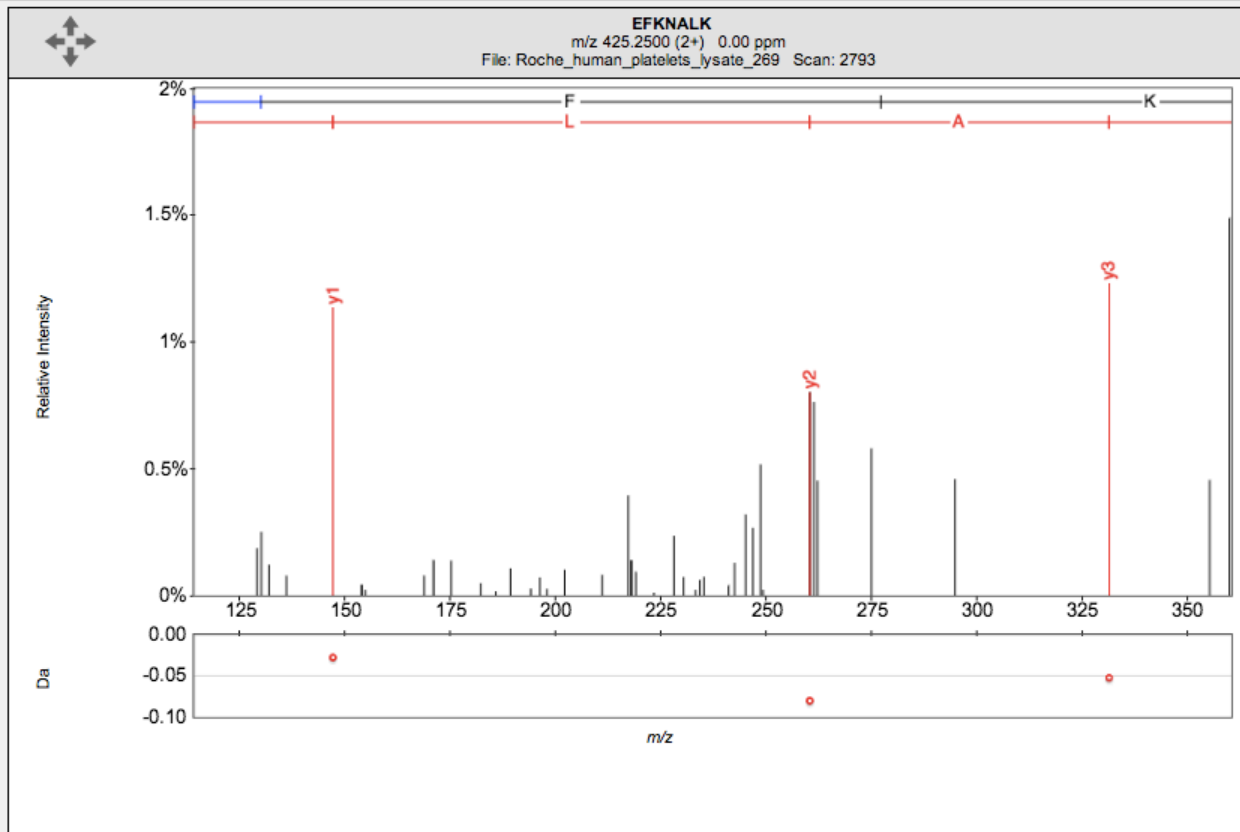

| b1+      | # | Seq | # | y1+      |
|----------|---|-----|---|----------|
| 130.0499 | 1 | E   | 7 |          |
| 277.1183 | 2 | F   | 6 | 720.4403 |
| 405.2132 | 3 | K   | 5 | 573.3719 |
| 519.2562 | 4 | N   | 4 | 445.2769 |
| 590.2933 | 5 | A   | 3 | 331.234  |
| 703.3774 | 6 | L   | 2 | 260.1969 |
|          | 7 | K   | 1 | 147.1128 |

| Sequence                                   | -log q-... | -log PEP | Search Engi... | Score | Delta Score | z | Theoretic... | Measured... | Mass Err... | Fixed Mo... | Variable ... | Project    | Experiment   |
|--------------------------------------------|------------|----------|----------------|-------|-------------|---|--------------|-------------|-------------|-------------|--------------|------------|--------------|
| <b>MS<sup>2</sup></b> R.NTDVQGALCQLLVGKR.S | 2.2539     | 0.53     | Andromeda      | 81.45 | 4.86        | 3 | 1827.0037    | 1770.9411   | -30685.54   | Carbamid... |              | Munoz_M... | 4Skin_Mix... |
| <b>MS<sup>2</sup></b> R.NTDVQGALCQLLVGKR.S | 2.2539     | 0.53     | Andromeda      | 81.45 | 4.86        | 3 | 1827.0037    | 1770.9411   | -30685.54   | Carbamid... |              | Munoz_M... | 4Skin_Mix... |
| <b>MS<sup>2</sup></b> R.NTDVQGALCQLLVGKR.S | 2.2539     | 0.53     | Andromeda      | 81.45 | 4.86        | 3 | 1827.0037    | 1770.9411   | -30685.54   | Carbamid... |              | Munoz_M... | 4Skin_Mix... |

[Click for peptide details](#)

> Reference spectrum

> Fragments

Select All   Deselect All

a:  1+  2+  3+

b:  1+  2+  3+

c:  1+  2+  3+

x:  1+  2+  3+

y:  1+  2+  3+

z:  1+  2+  3+

yb:

IM:

M[H]:

Neutral loss:

CH3NO  C2H4O  CO2

NH3  CH2N2  C3H6

C2H5NO  C3H9N3

Max neutral loss count:

Mass tolerance:  Da

Expert Mode:  on  off

> Configuration

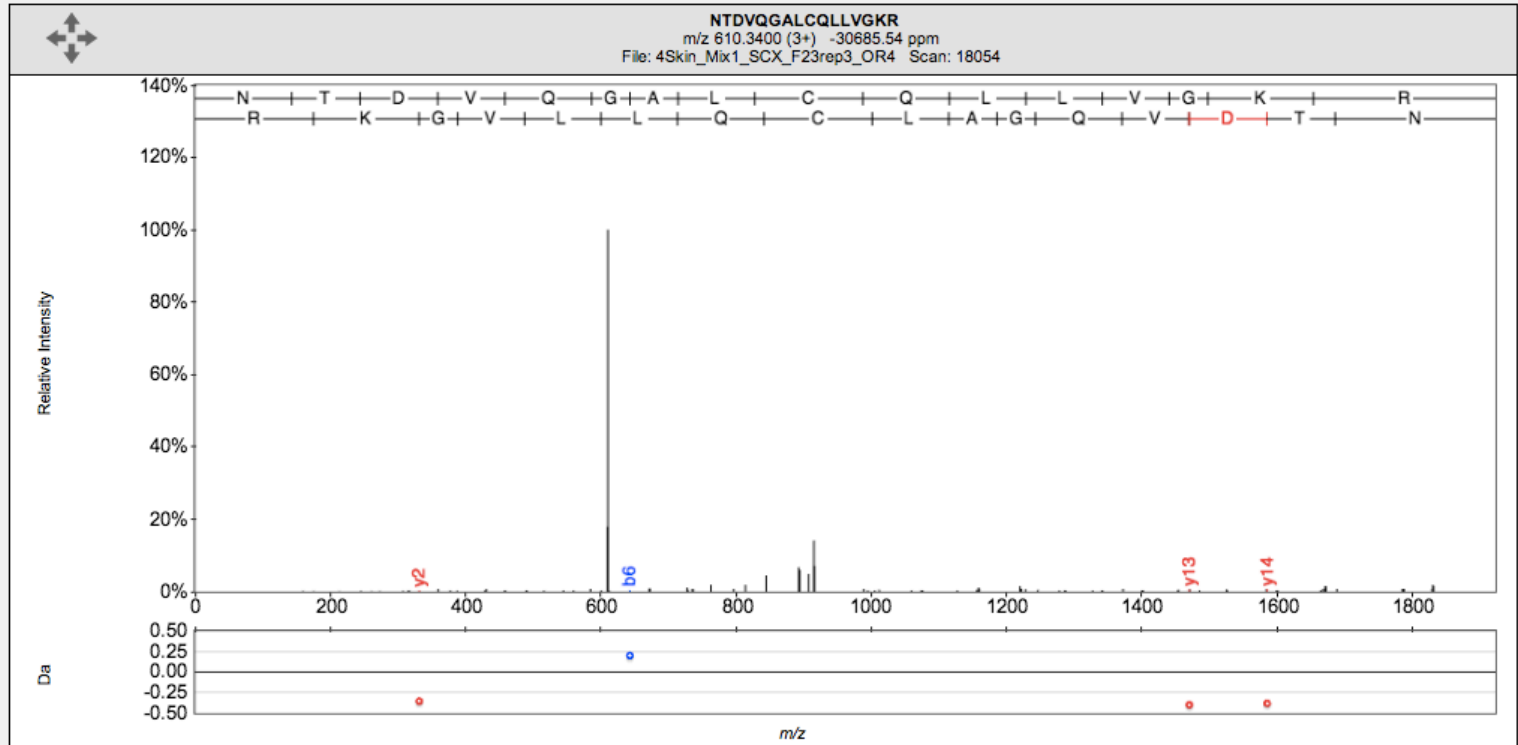

Fragment Ion Table
