# Supplementary material
Source: PubMed Central journal article supplement (PMC4334283)

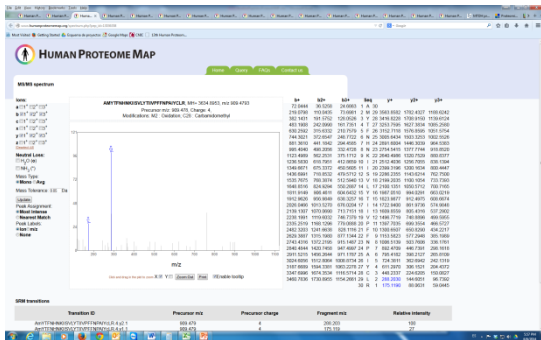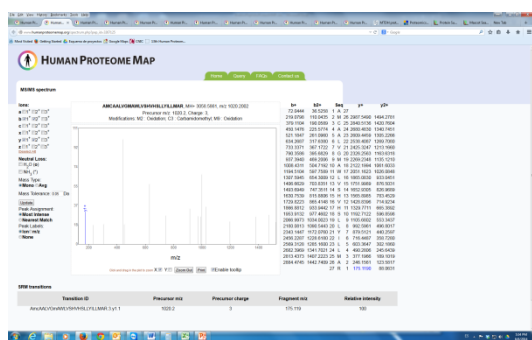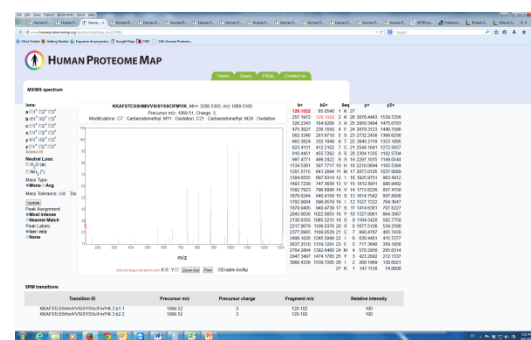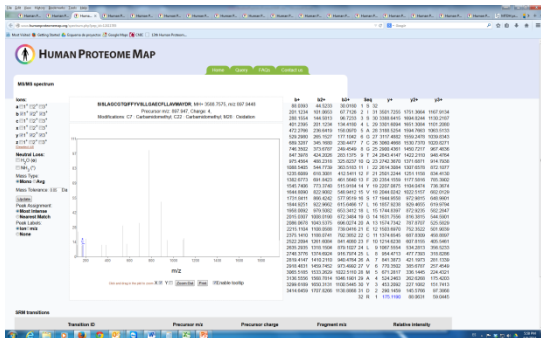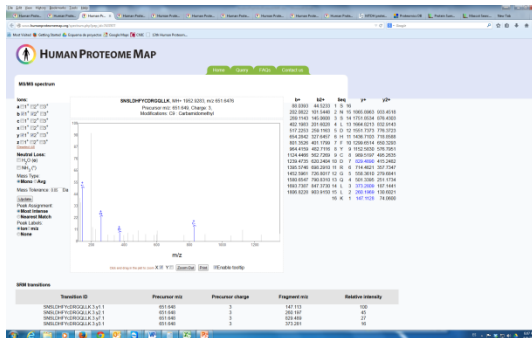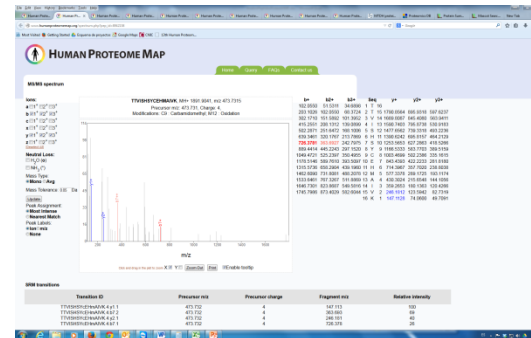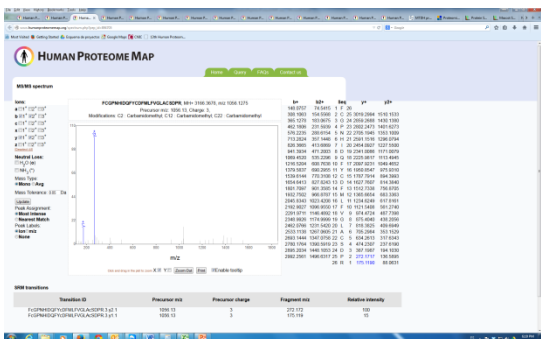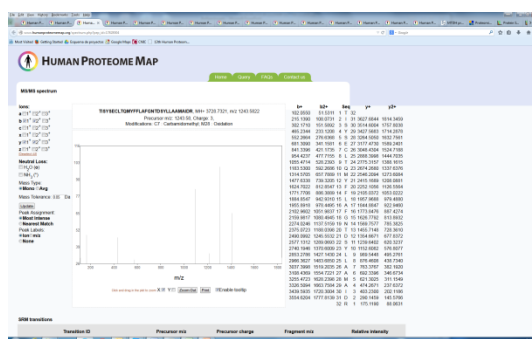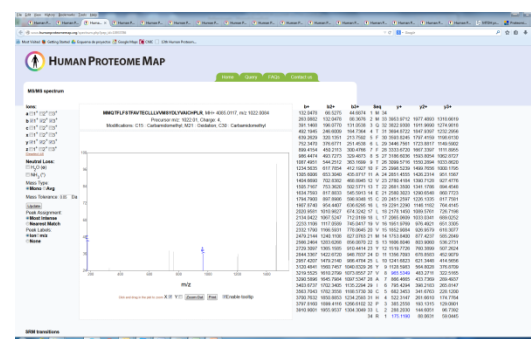

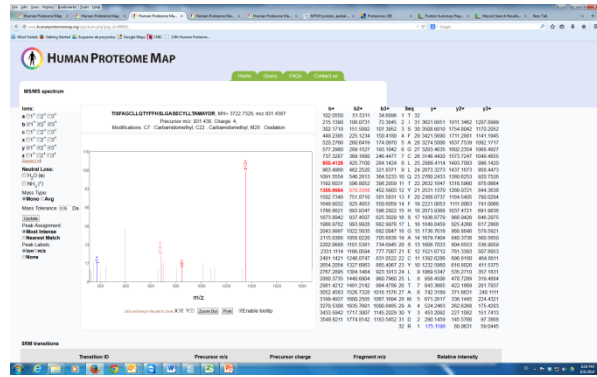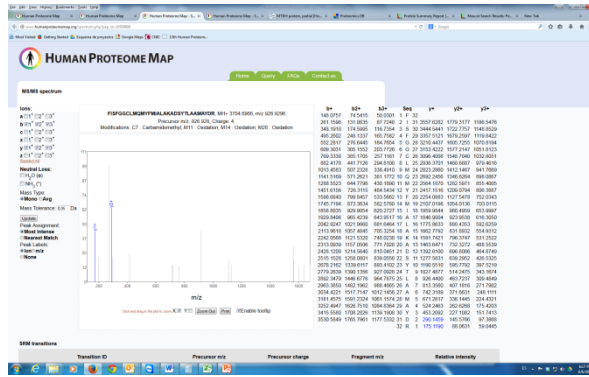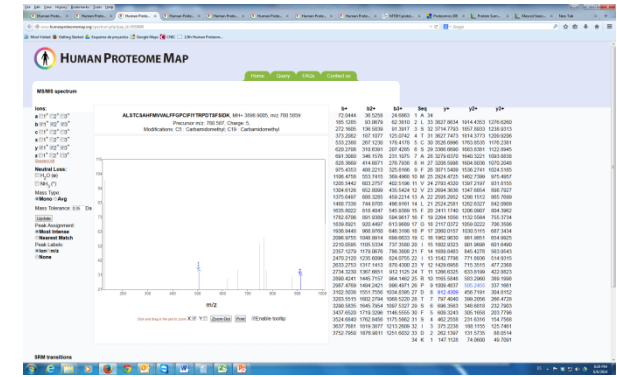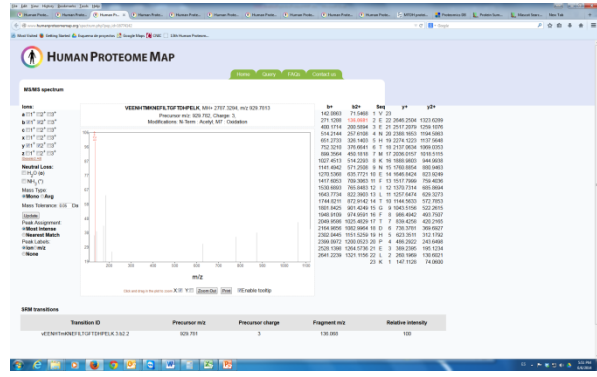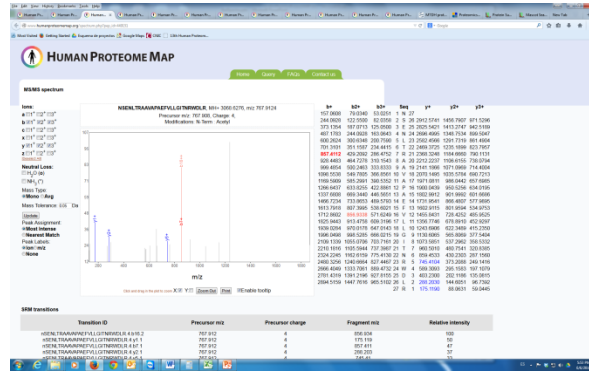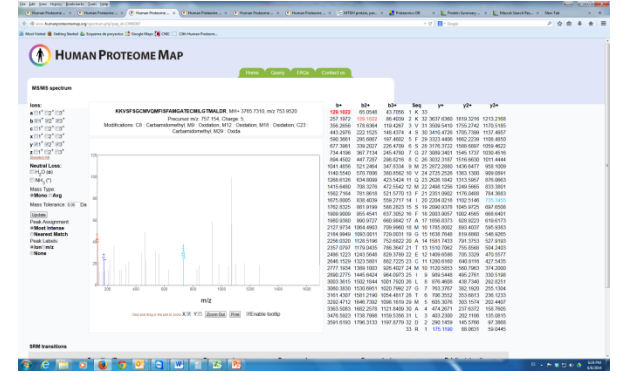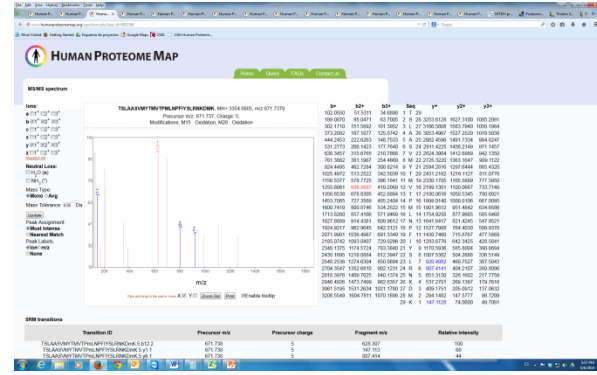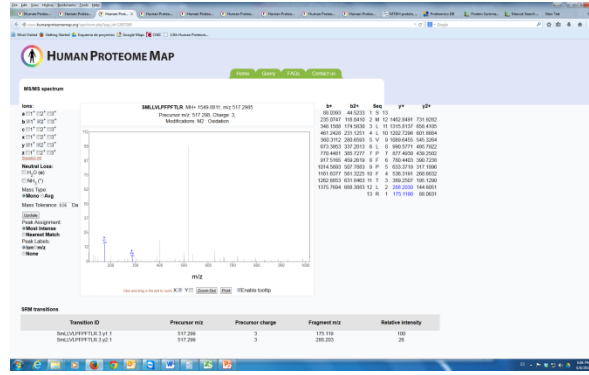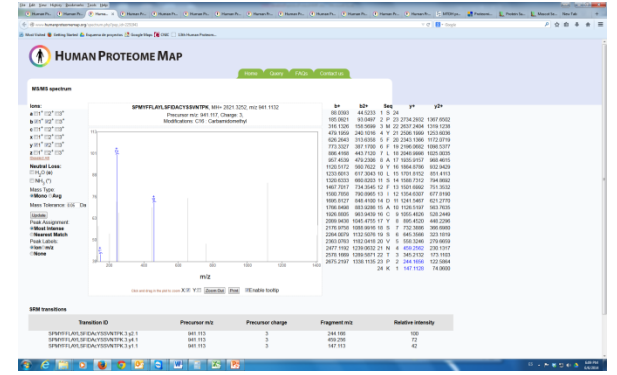

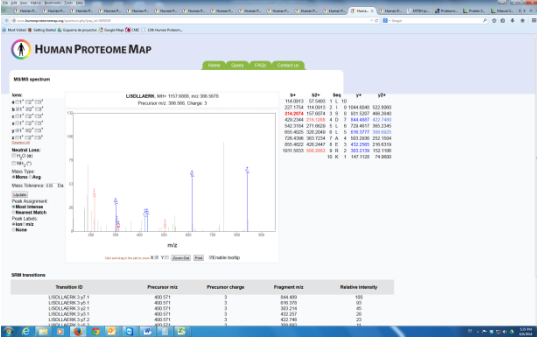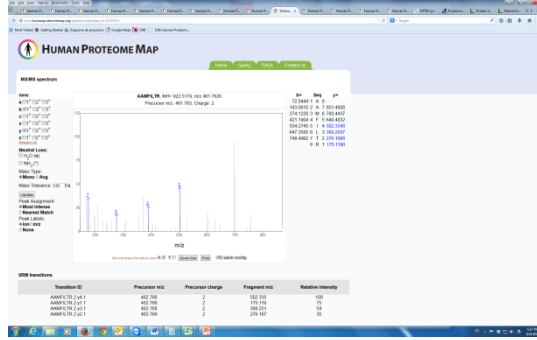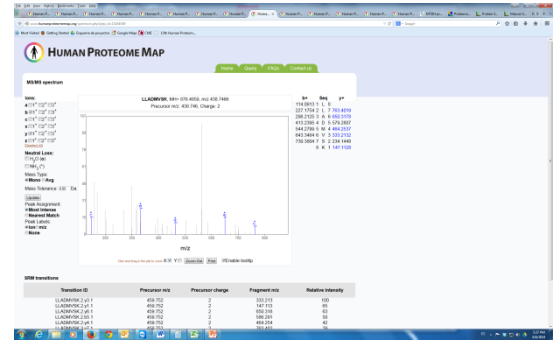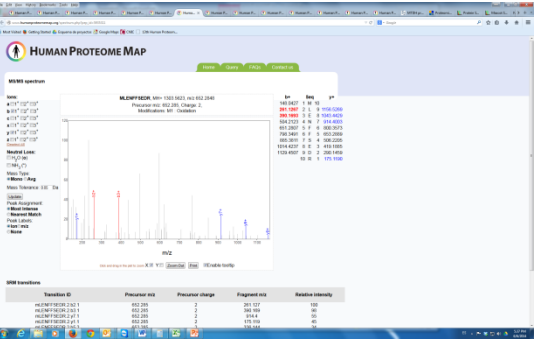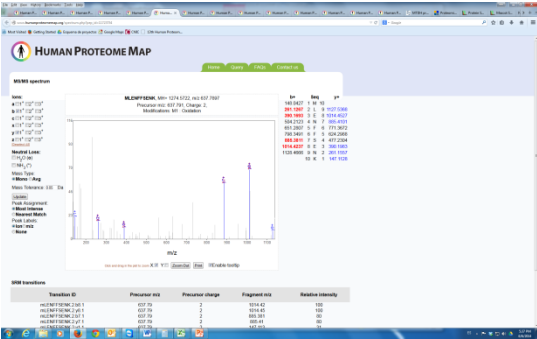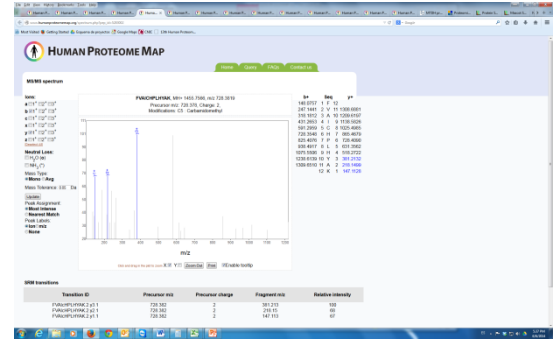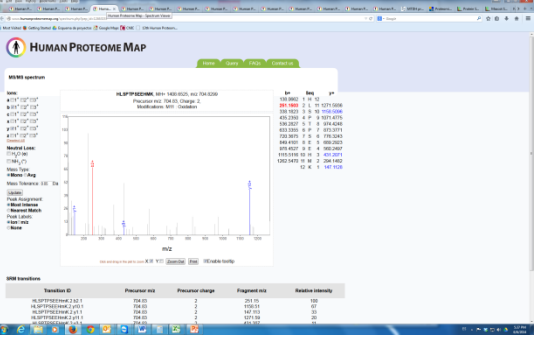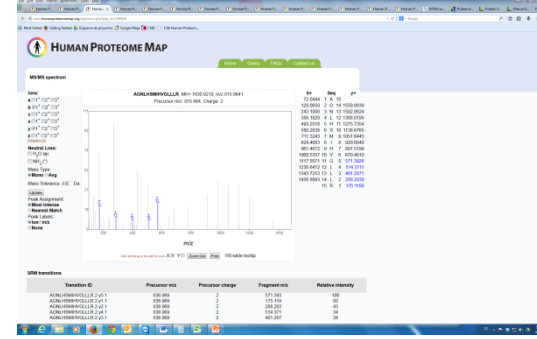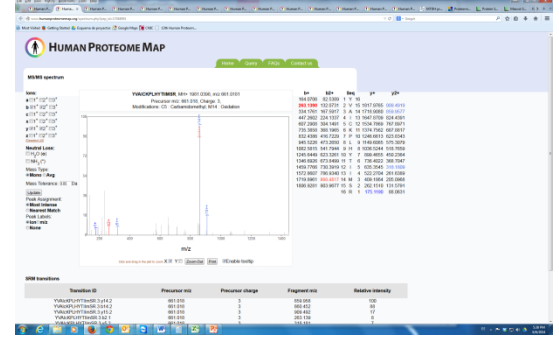



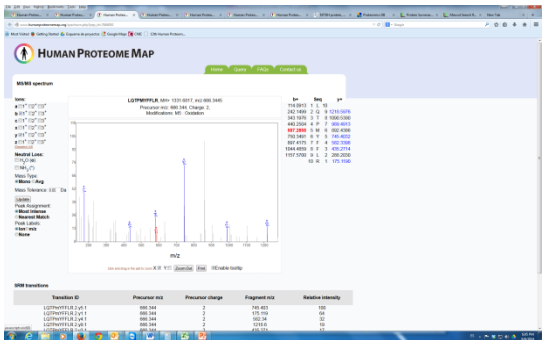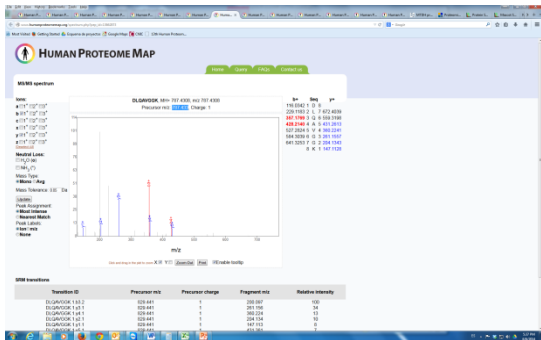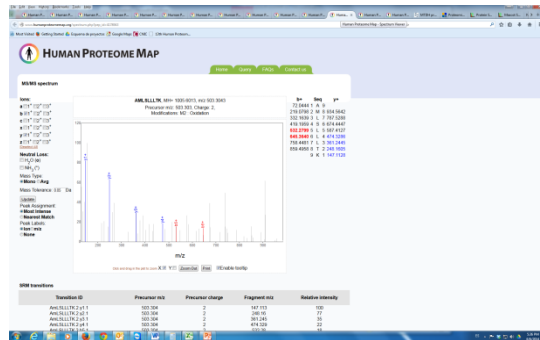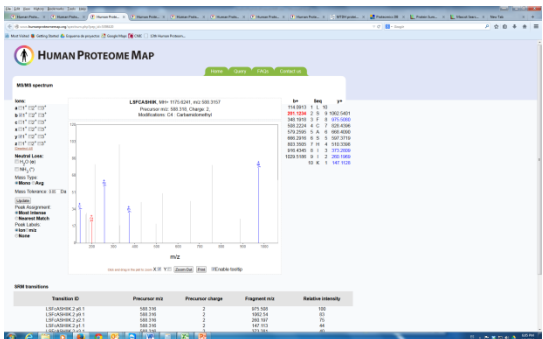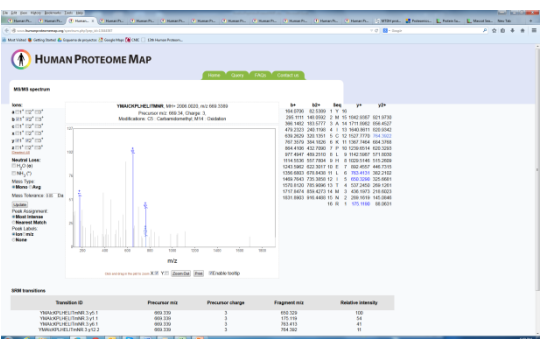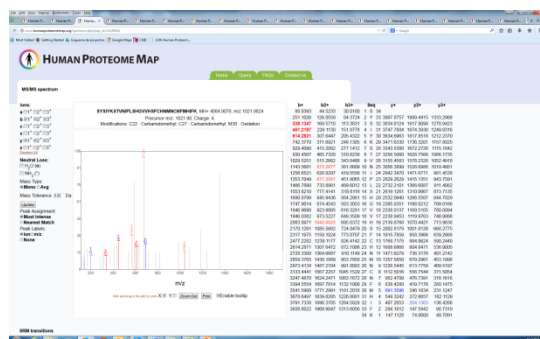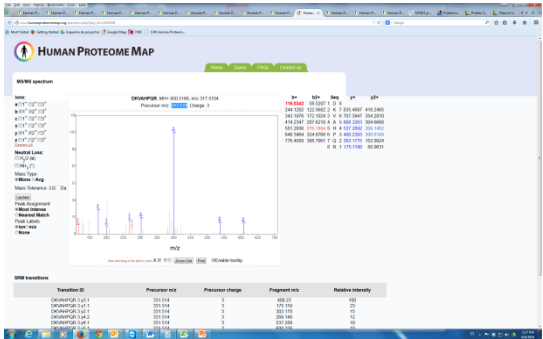

Supplement: pr500572z_si_001.pdf [file pr500572z_si_001.pdf]
